# Supplementary material
Source: PubMed Central journal article supplement (PMC2393813)

$$\frac{\partial[glu]}{\partial t} = D \left\{ \frac{\partial^2[glu]}{\partial x^2} \right\} + k_{-1}(U_{\max} - U) - k_1 U[glu] + \frac{dG}{dt} + \frac{dN_{2A}}{dt} + \frac{dN_{2B}}{dt} + \frac{dN_{2D}}{dt}$$

$$\frac{dU}{dt} = (k_{-1} + k_2)(U_{\max} - U) - k_1 U[glu]$$

$$\frac{dG}{dt} = k_{-1}(G_{\max} - G) - k_1 G[glu]$$

$$\frac{dN_{2A}}{dt} = k_{-1}(N_{2A:\max} - N_{2A}) - k_1 N_{2A}[glu]$$

$$\frac{dN_{2B}}{dt} = k_{-1}(N_{2B:\max} - N_{2B}) - k_1 N_{2B}[glu]$$

$$\frac{dN_{2D}}{dt} = k_{-1}(N_{2D:\max} - N_{2D}) - k_1 N_{2D}[glu]$$

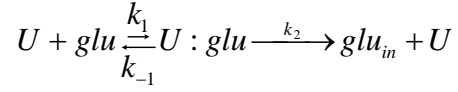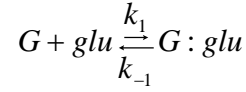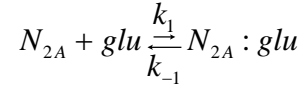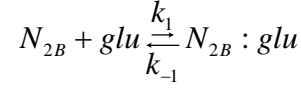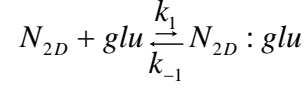

Supplement: pnas_0712008105_3.pdf [file pnas_0712008105_3.pdf]
