# Supplementary material
Source: PubMed Central journal article supplement (PMC2393813)

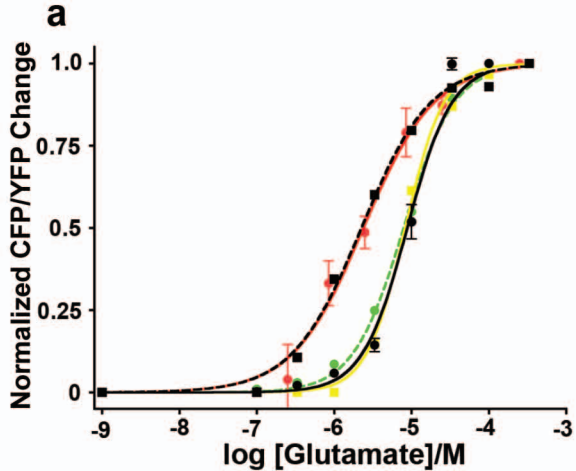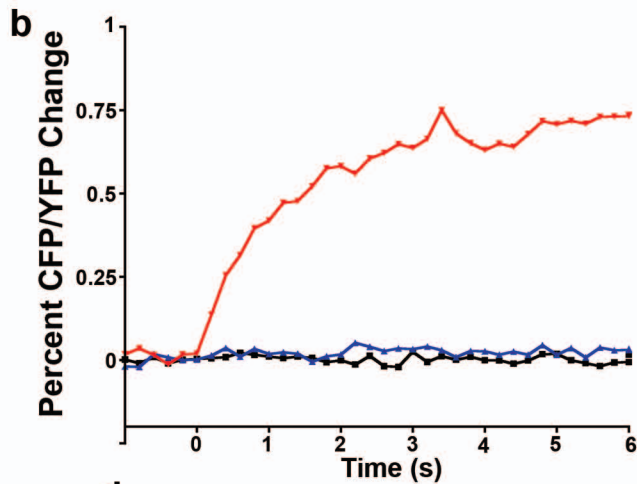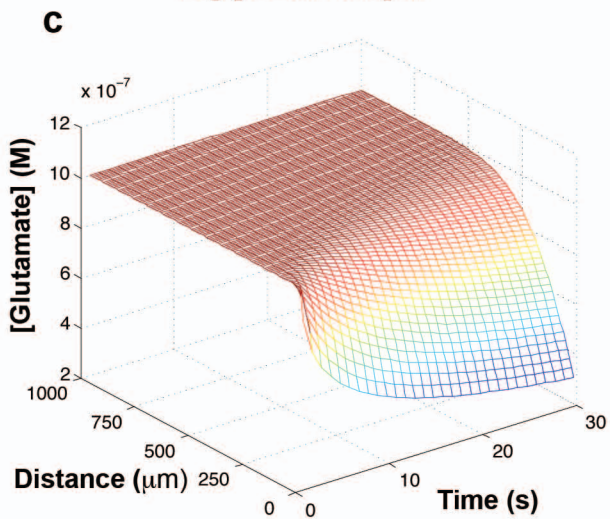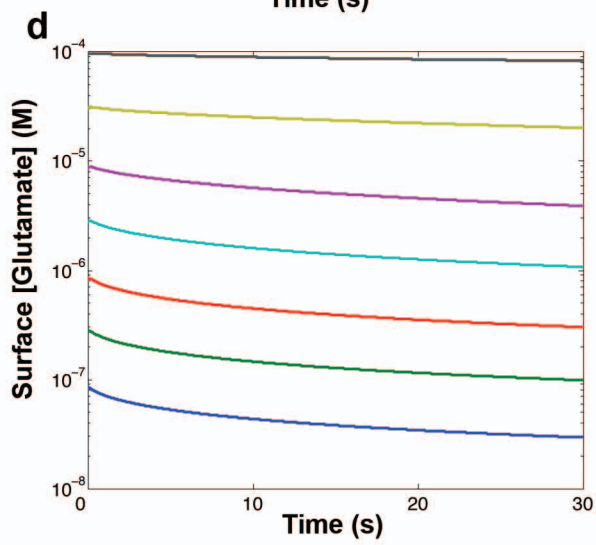

Supplement: pnas_0712008105_1.pdf [file pnas_0712008105_1.pdf]

**a**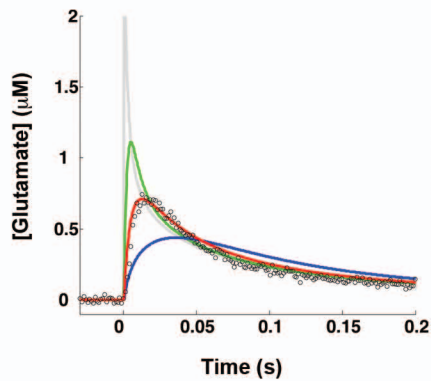**b**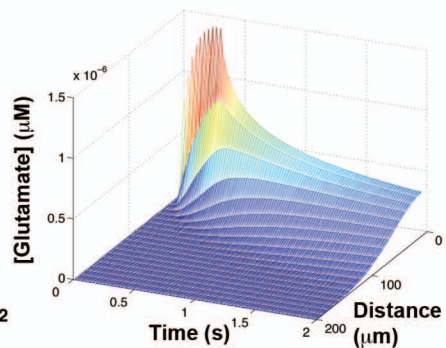**c**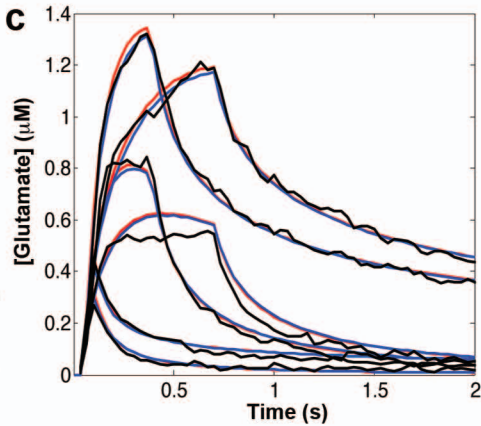**d**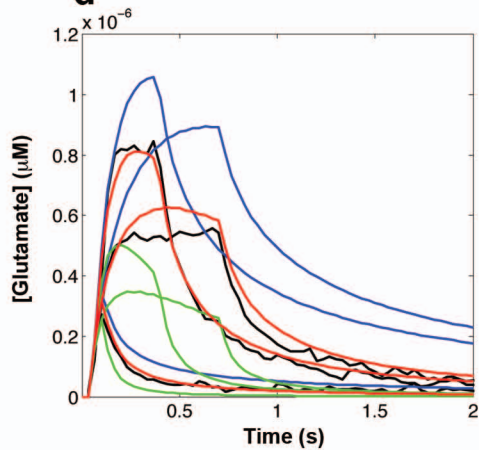**e**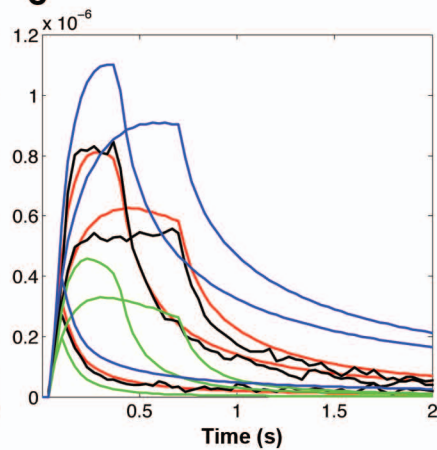

Supplement: pnas_0712008105_2.pdf [file pnas_0712008105_2.pdf]
